# Supplementary material for: Novel C60 Fullerenol-Gentamicin Conjugate–Physicochemical Characterization and Evaluation of Antibacterial and Cytotoxic Properties
Source: MDPI journal article supplement (doi:10.3390/molecules27144366), 2022-07-07
Supplement: s1 [file s1]

# Supplementary Material

## Novel C<sub>60</sub> Fullerenol-Gentamicin Conjugate– Physicochemical Characterization and Evaluation of Antibacterial and Cytotoxic Properties

Aleksandra Nurzynska <sup>1</sup>, Piotr Piotrowski <sup>2,\*</sup>, Katarzyna Klimek <sup>1,\*</sup>, Julia Król <sup>2</sup>, Andrzej Kaim, <sup>2</sup>  
and Grazyna Ginalska <sup>1</sup>

<sup>1</sup> Chair and Department of Biochemistry and Biotechnology, Medical University of Lublin, Chodzki 1 Street, 20-093 Lublin, Poland; aleksandra.nurzynska@umlub.pl (A.N.); g.ginalska@umlub.pl (G.G.)

<sup>2</sup> Department of Chemistry, University of Warsaw, Pasteura 1 Street, 02-093 Warsaw, Poland; j.krol10@student.uw.edu.pl (J.K.); akaim@chem.uw.edu.pl (A.K.)

\* Correspondence: ppiotrowski@chem.uw.edu.pl (P.P.); katarzyna.klimek@umlub.pl (K.K.)

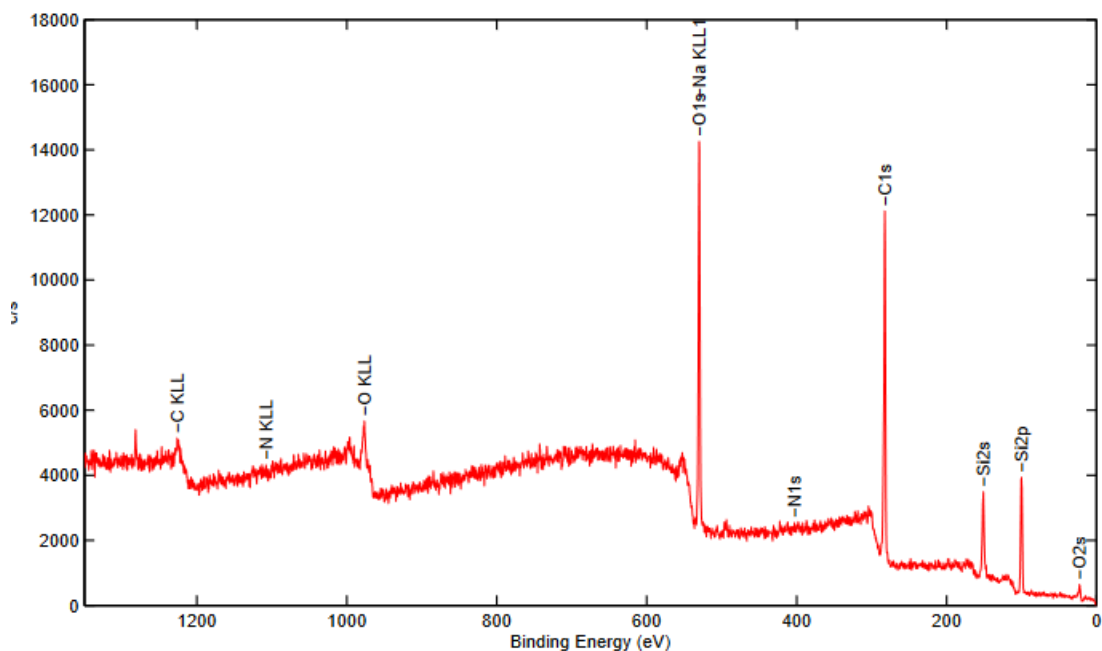

**Figure S1.** Survey XPS spectrum of gentamicine modified C<sub>60</sub> fullerene (60FGG).

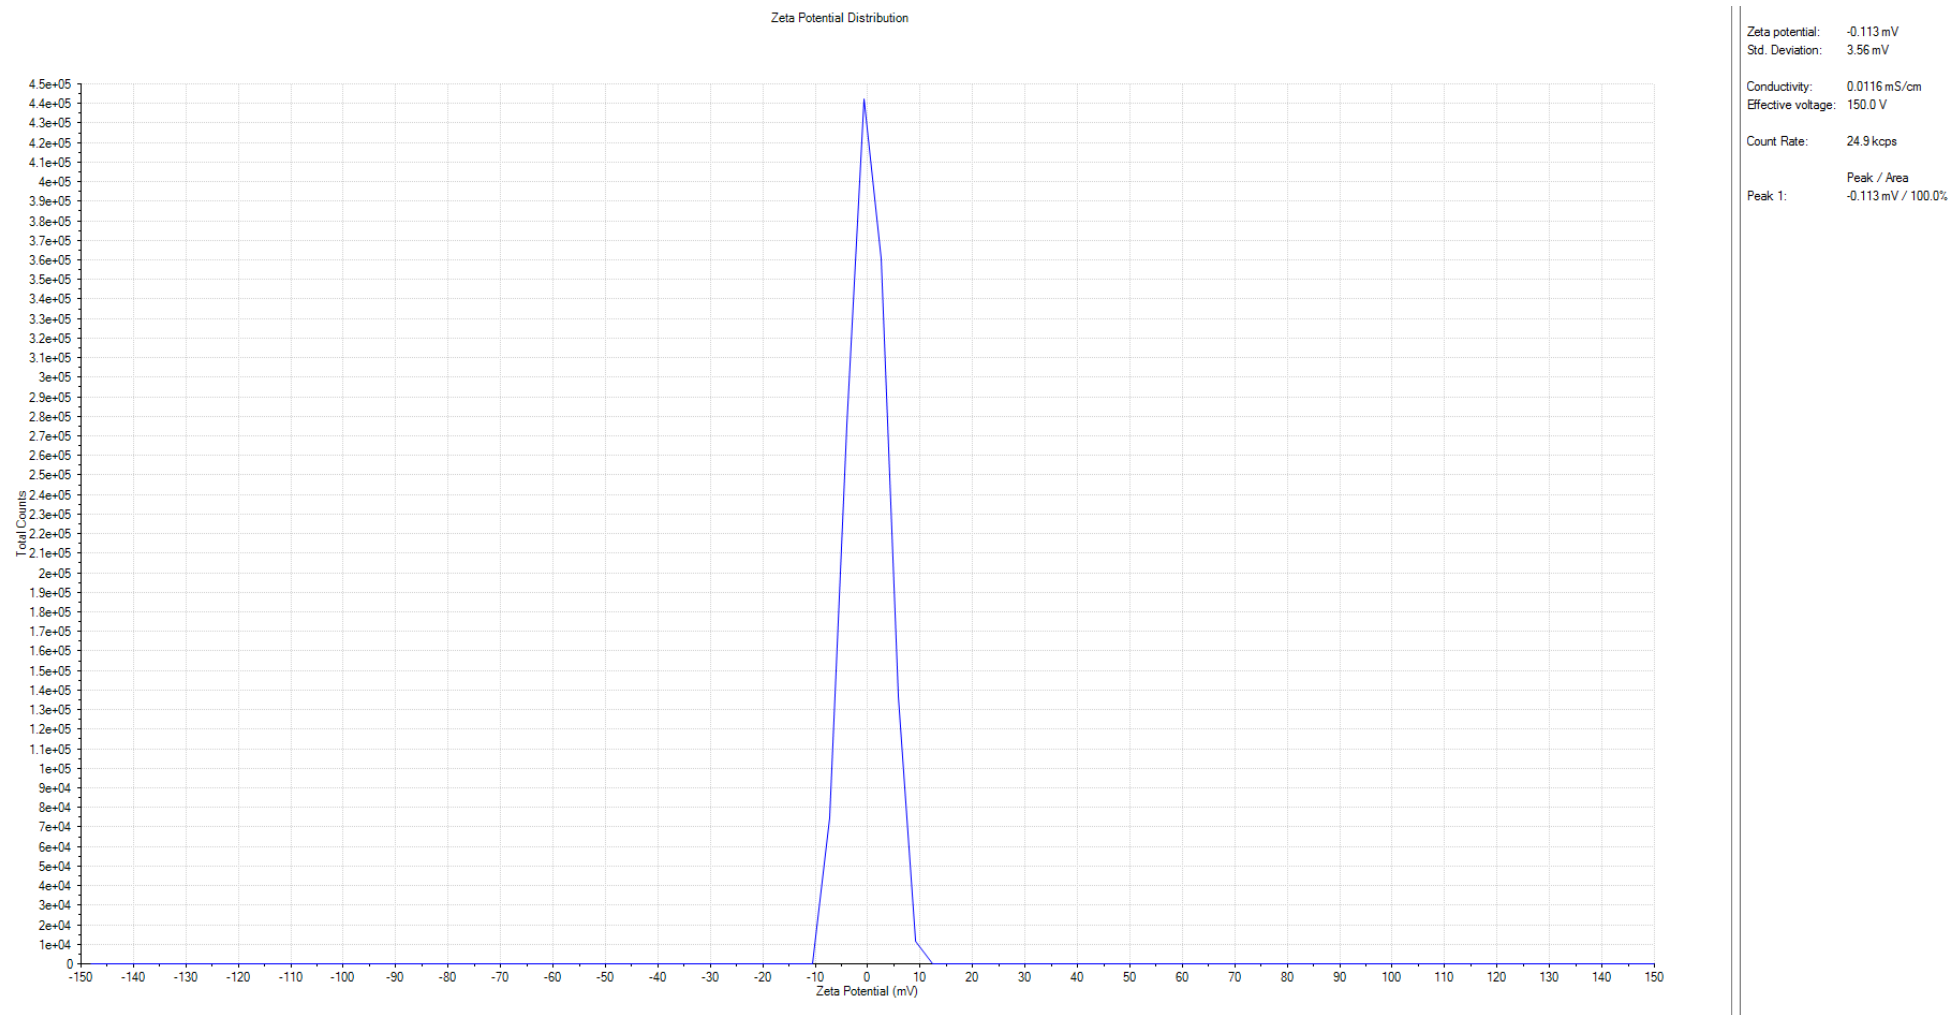

**Figure S2.** Zeta potential measurements of C<sub>60</sub> fullerene (60F).

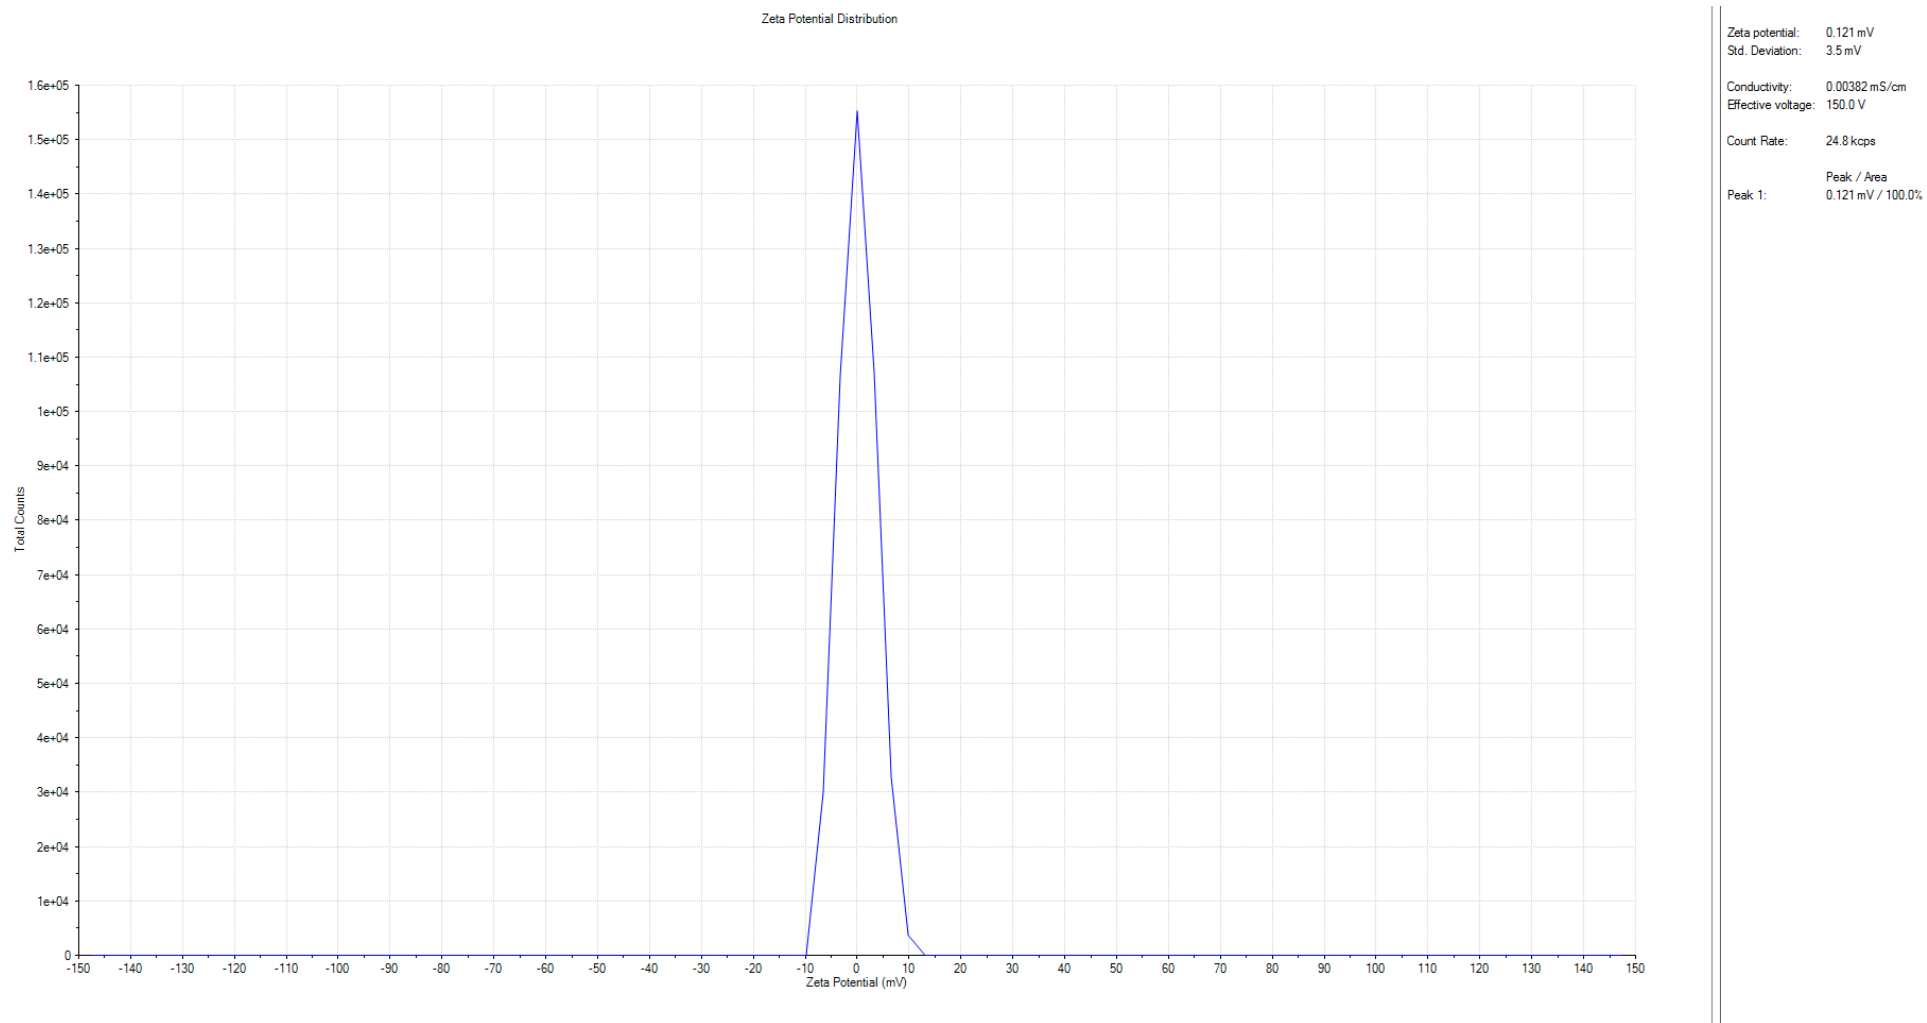

**Figure S3.** Zeta potential measurements of gentamicin functionalized C<sub>60</sub> fullerene (60FGG).
